# Supplementary material
Source: HighWire-hosted journal article supplement (https://srh.bmj.com/content/43/4/309)
Supplement: inline-supplementary-material-1 [file inline-supplementary-material-1.pdf]

## Appendix 1. Search Strategy Example: Ovid (MEDLINE)

|    | <b>Search Strategy</b>                                            | <b>Articles Retrieved</b> |
|----|-------------------------------------------------------------------|---------------------------|
| 1  | post abortion care.mp.                                            | 111                       |
| 2  | postabortion care.mp.                                             | 114                       |
| 3  | post-abortion care.mp.                                            | 111                       |
| 4  | comprehensive abortion care.mp.                                   | 19                        |
| 5  | postabortion.mp.                                                  | 677                       |
| 6  | post-abortion.mp.                                                 | 508                       |
| 7  | post abortion.mp.                                                 | 508                       |
| 8  | 1 or 2 or 3 or 4 or 5 or 6 or 7                                   | 1159                      |
| 9  | contraception/                                                    | 17242                     |
| 10 | contracept*.tw.                                                   | 56161                     |
| 11 | family planning/                                                  | 23264                     |
| 12 | family planning.tw.                                               | 17647                     |
| 13 | (sexual and reproductive health information).mp.                  | 67                        |
| 14 | (sexual and reproductive health and rights).mp.                   | 492                       |
| 15 | 9 or 10 or 11 or 12 or 13 or 14                                   | 77925                     |
| 16 | developing country/                                               | 67790                     |
| 17 | low-and middle-income countries.mp.                               | 3330                      |
| 18 | 15 or 16                                                          | 137164                    |
| 19 | 8 and 15 and 18                                                   | 556                       |
| 20 | limit 19 to (English language and full text and yr="2000 - 2015") | <b>26</b>                 |

The 20 step Medline (OVID) search strategy yielded 26 relevant articles. The example and search terminology were used as a framework for subsequent ProQuest, Science Direct, Web of Science, PUBMED and CINAHL database searches.

### **Ovid (MEDLINE) Search Strategy Key<sup>1</sup>:**

**<term>.mp.** The fields searched by a .mp. include Title, Original Title, Abstract, Subject Heading, Name of Substance, and Registry Word fields.

**<term>/** In databases with a controlled vocabulary this command searches a known subject heading directly, bypassing mapping.

**<term>\* or <term>\$** Unlimited truncation retrieves all possible suffix variations of the root word indicated.

**<term>tw** The Text Word (TW) index is an alias for all of the fields in a database which contain text words and which are appropriate for a subject search. The Textword index in Ovid MEDLINE (R) includes Title (TI) and Abstract (AB).

1. Ovid MEDLINE 2016 Database Guide. Secondary 2016 Database Guide 2016.

<http://ospguides.ovid.com/OSPguides/medline.htm#stopwords>.
